# Supplementary material for: Urban groundwater quality in sub-Saharan Africa: current status and implications for water security and public health
Source: PubMed Central journal article supplement (PMC6991975; doi:10.1007/s10040-016-1516-6), 2017-01-18
Supplement: 10040_2016_1516_MOESM1_ESM.pdf [file 10040_2016_1516_MOESM1_ESM.pdf]

**Urban groundwater quality in sub-Saharan Africa: current status and implications for water security and public health**

**Hydrogeology Journal – Electronic Supplementary Material**

Lapworth D.J.<sup>1\*</sup>, Nkhuwa D.C.W.<sup>2</sup>, Okotto-Okotto J.<sup>3</sup>, Pedley S.<sup>4</sup>, Stuart M.E.<sup>1</sup>, Tijani M.N.<sup>5</sup>, Wright J.<sup>6</sup>

<sup>1</sup> British Geological Survey, Maclean Building, Wallingford, OX10 8BB, UK

<sup>2</sup> University of Zambia, Great East Road Campus, P.O. Box 32379, Lusaka, Zambia

<sup>3</sup> Victoria Institute for Research on Environment and Development (VIRED) International, Rabuour Environment and Development Centre, Kisumu-Nairobi Road, P.O. Box 6423-40103, Kisumu, Kenya

<sup>4</sup> Robens Centre for Public and Environmental Health, University of Surrey, Guildford, GU2 7XH, UK

<sup>5</sup> Department of Geology, University of Ibadan, Ibadan, Oyo State, Nigeria

<sup>6</sup> Geography and Environment, University of Southampton, Highfield, Southampton SO17 1BJ, UK

\*Corresponding author, email: [djla@bgs.ac.uk](mailto:djla@bgs.ac.uk)

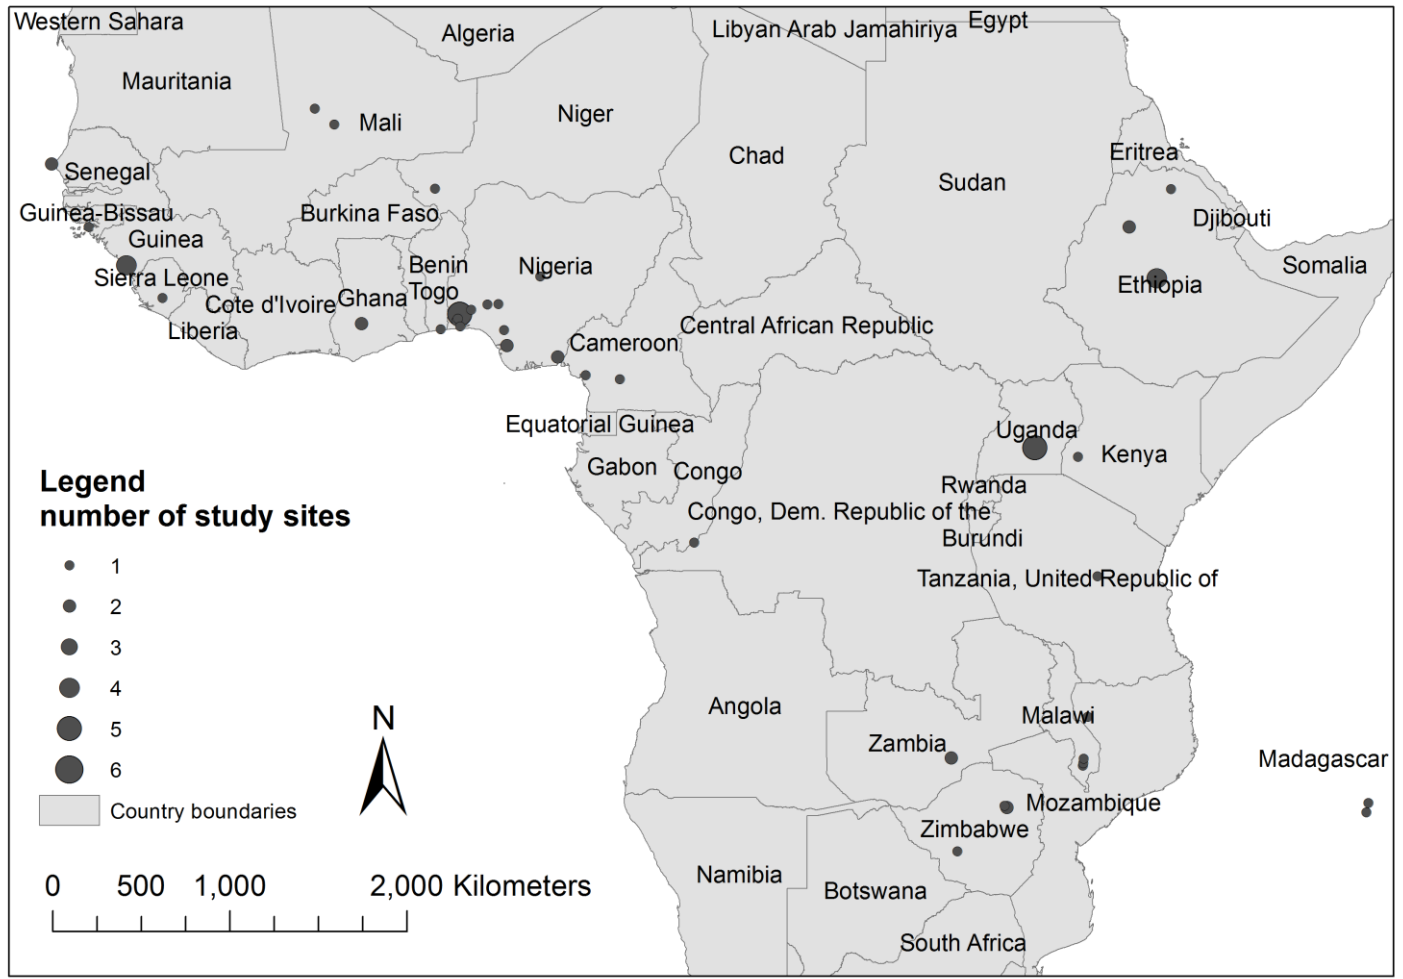

**Figure S1** Locations of the 31 studies included in the meta-analysis of nitrate concentrations of urban groundwater in sub-Saharan Africa (31 of the 48 of studies listed in Table S1)

**Table S1 Results from the literature review of urban groundwater quality studies across sub-Saharan Africa (n=48)**

| Area                                    | Geology                                    | Sample sites (n) | Results from selected water quality parameters                                                                                                                                                                                                                             |                                                                                                                                                                    | Sampling time-frame       | Conclusion and sources of contamination                                                    | Reference                        |
|-----------------------------------------|--------------------------------------------|------------------|----------------------------------------------------------------------------------------------------------------------------------------------------------------------------------------------------------------------------------------------------------------------------|--------------------------------------------------------------------------------------------------------------------------------------------------------------------|---------------------------|--------------------------------------------------------------------------------------------|----------------------------------|
| <sup>2</sup> Dakar, Senegal             | Quaternary sediments                       | Wells (56)       | NO <sub>3</sub> 0-122                                                                                                                                                                                                                                                      |                                                                                                                                                                    | July-October 1997         | Nitrate contamination from point-source seepage in urban areas                             | Cissé Faye et al. (2004)         |
| <sup>2</sup> Bolama City, Guinea Bissau | Sandy soils and Cenozoic –Modern sediments | Wells (28)       | SEC 27-326, mean 136<br>Turb. 1-26, mean 6.5<br>TC 0-23000, mean 2306<br>FC 0-5000, mean 410<br>Fecal Enterococci 0-850, mean 74<br>NO <sub>3</sub> 0.9-55.3, mean 16.6<br>NH <sub>4</sub> 0.01-1.37, mean 0.11<br>NO <sub>2</sub> 0.03-0.13, mean 0.04<br>Cu, Fe, Cr, As, |                                                                                                                                                                    | July 2006                 | 80% of wells contaminated with FC linked to widespread use of PL                           | Bordalo and Savva-Bordalo (2007) |
| <sup>3</sup> Conakry, Guinea            | Volcanic rocks, fissured                   | Wells (69)       | <b>Mod. wells</b><br>FC 370-1x10 <sup>5</sup><br>FS 90-9k<br>NO <sub>3</sub> 2-46<br>NH <sub>4</sub> 0.06-7<br>Cl 17-130<br>F 0-0.16<br>Turb. 1-70                                                                                                                         | <b>Trad. wells</b><br>FC 50-2 x10 <sup>5</sup><br>FS 150-2 x10 <sup>4</sup><br>NO <sub>3</sub> 7-51<br>NH <sub>4</sub> 0.01-8<br>Cl 8-284<br>F 0.038<br>Turb. 1-63 | Dry season April-May 1994 | Widespread contamination by nitrate and FC linked to poor sanitation and well construction | Gélinas et al. (1996)            |

| Area                                     | Geology                                          | Sample sites (n)                                                     | Results from selected water quality parameters                                                                                            | Sampling time-frame                            | Conclusion and sources of contamination                                                                                                                   | Reference                          |
|------------------------------------------|--------------------------------------------------|----------------------------------------------------------------------|-------------------------------------------------------------------------------------------------------------------------------------------|------------------------------------------------|-----------------------------------------------------------------------------------------------------------------------------------------------------------|------------------------------------|
| <sup>3</sup> Bo,<br>Sierra Leone         | Granitic<br>Basement                             | Wells (33)<br>lined and unlined                                      | FC 0-75, mean 19.6<br>NO <sub>3</sub> 0.5-28, mean 7.7<br>PO <sub>4</sub> 0.01-11.5, mean 1.7<br>SEC 39-1281, mean 362                    | Wet season                                     | Distance from field significant predictor of FC, not distance from toilet/PL                                                                              | Jimmy et al. (2013)                |
| <sup>2</sup> Various.<br>Ivory coast     | Basement                                         | Boreholes (230)                                                      | NO <sub>3</sub> mean 69                                                                                                                   | 1981 and 1982                                  | High nitrate (up to 200 mg/L) linked to domestic pollution and deforestation                                                                              | Faillat (1990)                     |
| <sup>1</sup> Kumasi,<br>Ghana            | Precambrian<br>Basement                          | Hand-dug wells<br>(10)                                               | TDS 6-230, mean 113<br>NO <sub>3</sub> 0-0.968, mean 0.16<br>PO <sub>4</sub> 0.67-15, mean 7.8<br>TH 8-103, mean 54<br>TC and E. coli <20 | N/A                                            | Water quality survey showed that water quality parameters were within WHO drinking water guideline values                                                 | Nkansah et al. (2010)              |
| <sup>3</sup> Kumasi,<br>Ghana            | Precambrian<br>Basement                          | Borehole and wells<br>in peri-urban<br>communities (9)               | Fe 0.001-0.955<br>Mn 0.018-0.238<br>Pb 0.005-0.074<br>TC 3-16.8×10 <sup>6</sup><br>FC 1.5-4.37×10 <sup>4</sup><br>Enterococci 1.3-53.5    | Monthly<br>between Dec<br>2000 and Jan<br>2001 | Poor quality overall,<br>contamination linked to<br>proximity to PL and refuse tips<br>as well as livestock                                               | Obiri-Danso et al.<br>(2009)       |
| <sup>2</sup> Cotonou,<br>Benin           | Quaternary to<br>mid<br>Pleistocene<br>sandstone | Dug wells in upper<br>aquifer in densely<br>populated area<br>(379)  | SEC 320-1045<br>Mn 0.06-0.19<br>NO <sub>3</sub> 10.4-118<br>PO <sub>4</sub> <0.05-21.6<br>SO <sub>4</sub> 3.14-86.3                       | May 1991,<br>August 1991<br>and April 1992     | High P and K concentrations in<br>upper aquifers linked to<br>anthropogenic pollution                                                                     | Boukari et al. (1996)              |
| <sup>1</sup> Ougadougou,<br>Burkina Faso | Basement                                         | >1000 sites,<br>Time series for<br>nitrate and SEC in<br>groundwater | pH, SEC and NO <sub>3</sub><br>Nitrate:<br><b>Wells</b> <50-250<br><b>Boreholes</b> 0-150                                                 | 2001-2004                                      | Nitrate concentrations higher<br>during high rainfall conditions.<br>Shallow wells have higher NO <sub>3</sub><br>concentrations compared to<br>boreholes | Ouandaogo-Yameogo<br>et al. (2013) |

| Area                                                  | Geology                                          | Sample sites ( <i>n</i> )                         | Results from selected water quality parameters                                                                                                                 | Sampling time-frame           | Conclusion and sources of contamination                                                                                             | Reference                |
|-------------------------------------------------------|--------------------------------------------------|---------------------------------------------------|----------------------------------------------------------------------------------------------------------------------------------------------------------------|-------------------------------|-------------------------------------------------------------------------------------------------------------------------------------|--------------------------|
| <sup>3</sup> Ilesha, Nigeria                          | Basement                                         | Wells (86)                                        | Mean results:<br>NO <sub>3</sub> 35<br>Cl 34<br>SO <sub>4</sub> 2.8                                                                                            | Single survey                 | Evidence of anthropogenic impact on water quality degradation using PCA                                                             | Malomo et al. (1990)     |
| <sup>1</sup> Benin City, Nigeria                      | Quaternary to mid Pleistocene sandstone          | Boreholes and open wells (6)                      | Pb 0.03-0.25<br>Zn 0.98-7.19<br>Cr 0.02-1.1<br>Cd Nd-0.23<br>FC 4600-240000<br>FS 600-35000                                                                    | Single survey                 | Elevated Pb, Cr, Cd and Zn attributed to indiscriminate waste disposal and FC occurrence linked to PL, soak-always and septic tanks | Erah and Akujieze (2002) |
| <sup>2</sup> Calabar, Nigeria                         | Tertiary to recent sands and gravels             | Existing wells (20)                               | BOD 0.06-4.09, mean 1.72<br>N 0.09-3.5, mean 2.15<br>Cl 0.1-1, mean 0.45<br>FC 0.75-4.32, mean 1.86                                                            | N/A                           | FC, nitrate and Cl had a positive correlation with urbanisation                                                                     | Eni et al. (2011)        |
| <sup>1</sup> Ibadan, Nigeria                          | Basement, banded gneiss and schist               | Existing wells (N/A)                              | TSS 159-186.6, mean 174<br>Cl 1.1-10, mean 5<br>TC 2300-9200, mean 5120                                                                                        | Dry season                    | Gross pollution of groundwater attributed to poor well construction, PL and waste management                                        | Ochieng et al. (2011)    |
| <sup>2</sup> Ibogun, Pakoto, Ifo, Ogun State, Nigeria | Cambrian basement geology and weathered regolith | Dug wells, communities of 5000-20,000 people (20) | TDS 100-2200<br>TH 6-246<br>NO <sub>3</sub> 0.8-88<br>TC 0-0.6 (cfu x10 <sup>5</sup> )<br>FC 0-0.2 (cfu x10 <sup>5</sup> )<br>FS 0-0.7 (cfu x10 <sup>5</sup> ) | July-August 2009              | Water quality standards for nitrate, FC, FS not met for significant proportion of wells                                             | Adelekan (2010)          |
| <sup>1</sup> Lagos, Nigeria                           | Alluvium over sedimentary                        | Urban wells (18)                                  | TDS 79-1343, mean 514<br>TH 24-289, mean 110<br>Na 8-274, mean 79                                                                                              | Survey August to October 2004 | Sources of contamination included sanitation, textiles,                                                                             | Yusuf (2007)             |

| Area                                               | Geology                          | Sample sites (n)                                | Results from selected water quality parameters                                                                                                                  |                                                                                                                                     | Sampling time-frame | Conclusion and sources of contamination                                                                                                                      | Reference                  |
|----------------------------------------------------|----------------------------------|-------------------------------------------------|-----------------------------------------------------------------------------------------------------------------------------------------------------------------|-------------------------------------------------------------------------------------------------------------------------------------|---------------------|--------------------------------------------------------------------------------------------------------------------------------------------------------------|----------------------------|
|                                                    |                                  |                                                 | NO <sub>3</sub> 0.05-1.51, mean 0.4<br>Pb 0-1.9, mean 1.6<br>Zn 0-4.2 mean 0.3                                                                                  |                                                                                                                                     |                     | pharmaceuticals, food, tanneries, motor industry                                                                                                             |                            |
| <sup>1</sup> Surulere, Lagos, Nigeria              | Alluvium over sedimentary        | Wells and boreholes in a middle class area (49) | Al 1-99 µg/L<br>Cd 1-98 µg/L<br>Pb 1-24 µg/L                                                                                                                    |                                                                                                                                     | July 2009           | Pb and Cd above WHO drinking water standards in >30% of sites                                                                                                | Momodu and Anyakora (2010) |
| <sup>1</sup> Abeokuta, Nigeria                     | Basement igneous and metamorphic | Shallow wells including sanitary survey (40)    | All bacterial count >20<br>Maximum 800 E. coli +PA+SAL                                                                                                          |                                                                                                                                     | December 2005       | Shallow groundwater is highly contaminated with bacteria. Sources include pit latrines, livestock and solid waste                                            | Olabisi et al. (2008)      |
| <sup>2</sup> Abeokuta, Nigeria, urban & peri-urban | Basement igneous and metamorphic | Shallow wells (76)                              | <b>Urban</b><br>(mean)<br>TDS 402<br>TH 30.3<br>NO <sub>3</sub> 12.02<br>PO <sub>4</sub> 0.21<br>Pb 0.25<br>Zn 0.12<br>TC 10500                                 | <b>Peri-urban</b><br>(mean)<br>TDS 263<br>TH 31.7<br>NO <sub>3</sub> 10.7<br>PO <sub>4</sub> 0.03<br>Pb 0.19<br>Zn 0.09<br>TC 10000 | Dry season          | Mean values for Pb, nitrate E. coli and TC > WHO standards. Trading, textiles, transport, cottage industries, pit latrines<br>Generally higher in dry season | Orebiyi et al. (2010)      |
| <sup>1</sup> Peri-urban area, Abeokuta, Nigeria    | Basement igneous and metamorphic | Hand-dug wells (25)                             | TDS 50-270, mean 163<br>NO <sub>3</sub> 2.97-40.7, mean 17.6<br>NH <sub>4</sub> 0-0.59, mean 0.11<br>PO <sub>4</sub> 12-86 µg/L, mean 46<br>TH 12-210, mean 106 |                                                                                                                                     | Rainy season 2008   | Direct surface run off into wells is suggested as possible contamination source                                                                              | Taiwo et al. (2011)        |

| Area                                           | Geology                                    | Sample sites ( <i>n</i> )                     | Results from selected water quality parameters                                                                             | Sampling time-frame         | Conclusion and sources of contamination                                                                                                    | Reference                |
|------------------------------------------------|--------------------------------------------|-----------------------------------------------|----------------------------------------------------------------------------------------------------------------------------|-----------------------------|--------------------------------------------------------------------------------------------------------------------------------------------|--------------------------|
| <sup>1</sup> Warri River plain, Delta, Nigeria | Alluvial Benin formation                   | Boreholes near WW treatment plant             | TDS 16-81<br>COD 0.4-44.4<br>NO <sub>3</sub> 0.3-1.2<br>Fe 0.05-0.15                                                       | 2 year sampling campaign    | River infiltration, municipal wastewater, agriculture, oil industry                                                                        | Ibe and Agbamu (1999)    |
| <sup>1</sup> Warri River plain, Delta, Nigeria | Quaternary and older sedimentary sequences | Dug wells                                     | Fe 0.32-2.75<br>Pb 0.058-0.443<br>Ni 0.008-0.188<br>V 0-4<br>Cr 0-9<br>Cd 0.75-8.5<br>Zn 0-1.8                             | N/A                         | Sources include Warri River, settlement, refinery. Highest values in village 3 km from refinery                                            | Aremu et al. (2002)      |
| <sup>1</sup> Masaka, Nigeria                   | Cretaceous sandstone and clay              | Dug wells, high density (12)                  | TDS 528-935<br>NO <sub>3</sub> 44.5-92.5<br>Alk 67-179<br>Cl 41-118<br>Fe 0.085-0.199<br>Cr 0.005-0.0126<br>TC 25900-78400 | Samples taken in wet season | WHO standards exceeded for a range of contaminants including nitrate, TDS, Cr, Cd and TC. High density settlement with shallow water table | Alhassan and Ujoh (2011) |
| <sup>2</sup> Yaounde, Cameroon                 | Basement                                   | Springs and wells in high density area (> 40) | SEC 18.2-430, mean 87<br>FC 60% >100<br>FS 5% >100                                                                         | One-off survey              | Groundwater's in high density zones show significant degradation (chemical and microbiological), linked to PL                              | Ewodo et al. (2009)      |
| <sup>2</sup> Douala, Cameroon                  | Alluvium over Pliocene sand and gravel     | Springs , wells and boreholes (72)            | SEC 25-362<br>NO <sub>3</sub> 0.21-94.3<br>FC 0-2311                                                                       | One-off survey              | High levels of FS indicative of contamination from PL, related to age and density of settlement                                            | Takem et al. (2010)      |
| <sup>2</sup> Brazaville, DR Congo              | Alluvial and sedimentary sequences         | Wells                                         | TDS 110 +/- 52.1<br>NO <sub>3</sub> 1.32 +/- 0.64                                                                          | Seasonal sampling           | Low nitrate concentrations and low TDS levels                                                                                              | Matini et al. (2012)     |

| Area                               | Geology                                 | Sample sites ( <i>n</i> )                                          | Results from selected water quality parameters                                                                                                                                               |                                                                                                      | Sampling time-frame                      | Conclusion and sources of contamination                                                                                                                                                                      | Reference                     |
|------------------------------------|-----------------------------------------|--------------------------------------------------------------------|----------------------------------------------------------------------------------------------------------------------------------------------------------------------------------------------|------------------------------------------------------------------------------------------------------|------------------------------------------|--------------------------------------------------------------------------------------------------------------------------------------------------------------------------------------------------------------|-------------------------------|
| <sup>2</sup> Kinshasa, DR Congo    | Alluvial and sedimentary sequences      | Wells including sanitary survey                                    | <b>Dry season</b><br>TDS 180-450<br>NO <sub>3</sub> 76-118<br>PO <sub>4</sub> 0.53-4.6<br>TH 110-149<br>Pb 0.04-0.09<br>Cd 0.13-0.20                                                         | <b>Wet season</b><br>TDS 200-710<br>NO <sub>3</sub> 97-198<br>PO <sub>4</sub> 3.6-14.6<br>TH 17-52.5 | One-off survey                           | Latrines, metal works, solid waste dumps are main sources of contamination                                                                                                                                   | Vala et al. (2011)            |
| <sup>2</sup> Mekelle, Ethiopia     | Mesozoic sediments                      | Wells, springs and boreholes (100)                                 | SEC 542-5300<br>TDS 330-3454<br>NH <sub>4</sub> 0.01-2.38<br>NO <sub>3</sub> 0.21-336<br>Cl 5.76-298<br>F 0-1.27, PO <sub>4</sub> 0.001-0.58                                                 |                                                                                                      | N/A                                      | Highly variable water quality indicative of a range of redox zones and sources of contamination                                                                                                              | Berhane and Walraevens (2013) |
| <sup>2</sup> Bahir Dar, Ethiopia   | Weathered and fractured Alkaline Basalt | Dug wells and protected pumps in inner, middle and outer zones (8) | <b>Middle and inner city</b><br>TDS 20-600<br>NO <sub>3</sub> 0.18-57.2<br>NH <sub>4</sub> 0-12<br>Cl 46-270<br>FC 93% of sites<br>Mean 1.5 log cfu<br>E. coli 80% sites<br>mean 1.4 log cfu | <b>Outer city</b><br>TDS 20-70<br>NO <sub>3</sub> 0.08-8.8<br>NH <sub>4</sub> 0-12<br>Cl 0-40        | Sampling over a 5 month period 2006/2007 | Groundwater contamination linked to population density and urbanisation. All dug wells and boreholes had microbiological contamination in excess of WHO/EU standards. Dug wells had significantly higher FC. | Tabor et al. (2011)           |
| <sup>1</sup> Addis Ababa, Ethiopia | Volcanics                               | Boreholes and springs (9)                                          | Alk 8-41<br>NO <sub>3</sub> 0.72-35<br>NO <sub>2</sub> <0.01<br>COD 6.8-41<br>Cl 6.8-28                                                                                                      |                                                                                                      | Various                                  | The authors made a link between the surface water quality and groundwater quality. Major sources of contamination inferred were domestic waste, and industrial pollution from                                | Abiye (2008)                  |



| Area                               | Geology            | Sample sites (n)                                     | Results from selected water quality parameters                                                                                              | Sampling time-frame                            | Conclusion and sources of contamination                                                                                                                       | Reference                                                         |
|------------------------------------|--------------------|------------------------------------------------------|---------------------------------------------------------------------------------------------------------------------------------------------|------------------------------------------------|---------------------------------------------------------------------------------------------------------------------------------------------------------------|-------------------------------------------------------------------|
|                                    |                    |                                                      | PO <sub>4</sub> <0.03-0.1<br>Pb 4.6-25 µg/L<br>SEC 300-1200<br>TC 0-34000                                                                   |                                                | textile industry and petrol stations                                                                                                                          |                                                                   |
| <sup>1</sup> Addis Ababa, Ethiopia | Volcanics          | Springs and boreholes (10)                           | Zn 0.87-146 µg/L<br>Ni 0.31-0.98 µg/L<br>Cu 0.44-1.82 µg/L<br>Pb 4.3-56.2 µg/L<br>Cd <0.1-0.2 µg/L<br>Co <0.1-0.12 µg/L                     | 2002                                           | Geogenic sources of heavy metals is the likely sources of groundwater contamination in this setting due to high heavy metal concentrations in soils and rocks | Alemayehu (2006)<br>Goshu and Akoma (2011)<br>Goshu et al. (2010) |
| <sup>1</sup> Addis Ababa, Ethiopia | Volcanics          | Springs and wells (63)                               | Ni 2-152 µg/L<br>Pb <1 µg/L<br>Co 0.5-165 µg/L<br>As <3 µg/L<br>Zn <20-2100 µg/L<br>Cu 1.5-164 µg/L<br>Cd 0.3-12.3 µg/L<br>Cr 18.2-214 µg/L | February-March 2004,<br>July to September 2005 | Urban area, leaching from polluted soils.                                                                                                                     | Demlie and Wohnlich (2006)                                        |
| <sup>1</sup> Wajir, Kenya          | Limestone          | Wells (30)                                           | NO <sub>3</sub> >45 in 50% sites<br>E. coli >50 for 50% sites, >100 for 35% of sites                                                        | Single campaign                                | Widespread pollution of shallow wells with nitrate and EC. Deeper aquifers are not suitable due to high salinity and low yields.                              | Mailu (1997)                                                      |
| <sup>2</sup> Eldoret, Kenya        | Tertiary Volcanics | Shallow wells (31)<br>Boreholes (4)<br>Tap water (5) | TTC<br>Wells: all but one site had >1100<br>Boreholes: <DL-23<br>Tap: <DL                                                                   | Single campaign                                | 40% of shallow wells wer <15 from a PL, 54% were 15-30 from a PL                                                                                              | Kimani-Murage and Ngindu (2007)                                   |

| Area                                                 | Geology                                        | Sample sites (n)                             | Results from selected water quality parameters                                                    |                                                                            | Sampling time-frame                                                     | Conclusion and sources of contamination                                                                                                                                                            | Reference             |
|------------------------------------------------------|------------------------------------------------|----------------------------------------------|---------------------------------------------------------------------------------------------------|----------------------------------------------------------------------------|-------------------------------------------------------------------------|----------------------------------------------------------------------------------------------------------------------------------------------------------------------------------------------------|-----------------------|
| <sup>3</sup> Kisumu, Kenya                           | Sedimentary/<br>Volcanics                      | Existing wells (191)                         | TTC 0->100k mean 894<br>NO <sub>3</sub> 0.06-45 mean 15<br>Cl 0-225 mean 796<br>F 3-29.6 mean 6.2 |                                                                            | 1998 and 2004                                                           | Density of PL within a 100 m radius was significantly correlated with nitrate and Cl but not FC (PC)                                                                                               | Wright et al. (2013)  |
| <sup>2</sup> Lichinga, Mozambique and Timbuktu, Mali | Quaternary/<br>Basement gneiss-granite complex | Hand dug wells: Timbuktu(31), Lichinga (159) | <b>Timbuktu</b><br>SEC 221-2010<br>NO <sub>3</sub> -N 35 med<br>Cl 500                            | <b>Lichinga</b><br>SEC 220 med<br>NO <sub>3</sub> 5.6 med<br>Cl 13.5       | Timbuktu September 2002 to May 2003<br>Lichinga, April 2002-August 2004 | Contamination of groundwater sources from on site sanitation traced using N:Cl                                                                                                                     | Cronin et al. (2007)  |
| <sup>3</sup> Lichinga, Mozambique                    | Mudstone                                       | Lichinga (25)                                | TTC, and Enterococi                                                                               |                                                                            | Monthly for 1 year                                                      | Higher risk at onset of the wet season and end of the dry season. Predominant source was from animal faeces rather than PL or septic tanks. (LR)                                                   | Godfrey et al. (2006) |
| <sup>2</sup> Kampala, Uganda                         | Weathered Basement                             | Wells and springs                            | <b>High density</b><br>NO <sub>3</sub> mean 67<br>Cl mean 59<br>TC mean 14                        | <b>Low density</b><br>NO <sub>3</sub> mean 22<br>Cl mean 21<br>TC mean 544 | Contrasting hydrological conditions                                     | Significantly higher contamination in high density regions compared to low density                                                                                                                 | Barrett et al. (1998) |
| <sup>3</sup> Kampala, Uganda                         | Weathered Basement                             | Springs (25)                                 | TTC (FC)<br>FS BLD-23000                                                                          |                                                                            | Monthly between September 1998-March 1999                               | Evidence of rapid recharge to springs following rainfall. Local environment hygiene and improved sanitary completion shown to be more important than on-site sanitation for spring protection (LR) | Howard et al. (2003)  |

| Area                                 | Geology            | Sample sites ( <i>n</i> )                         | Results from selected water quality parameters                                                                                                              | Sampling time-frame                 | Conclusion and sources of contamination                                                                                           | Reference                |
|--------------------------------------|--------------------|---------------------------------------------------|-------------------------------------------------------------------------------------------------------------------------------------------------------------|-------------------------------------|-----------------------------------------------------------------------------------------------------------------------------------|--------------------------|
| <sup>1</sup> Kampala, Uganda         | Weathered Basement | Boreholes and wells (28)                          | Limited inorganic and organic suit, no microbiology                                                                                                         | September and October 2011          | Nitrate concentrations suggest poor sanitation and diffuse contamination.                                                         | Nachiyunde et al. (2013) |
| <sup>3</sup> Uganda, Kampala (urban) | Weathered basement | Piezometers (10)                                  | 1.5 m down gradient of pit latrines<br>NO <sub>3</sub> 5-90<br>Cl 50-1100<br>PO <sub>4</sub> 0.1-2<br>NH <sub>4</sub> 5-40                                  | March-August 2010 biweekly sampling | PL found to be a significant source of nutrients (N) compared to waste dump. NH <sub>4</sub> removal by nitrification             | Nyenje et al. (2013)     |
| <sup>1</sup> Lusaka, Zambia          | Dolomite           | Wells and streams in intensely urbanised area (9) | SEC 200-710<br>NO <sub>3</sub> <0.1-43<br>NH <sub>4</sub> <0.25-3.5, Cl 4.6-36<br>PO <sub>4</sub> <0.1-4, B <1-10, As <0.2-0.49<br>Pb 0.14-0.67, Hg <0.4-13 | July 2001                           | Values for nitrate and Hg were in excess of WHO standards on some occasions. Poor sanitation and solid waste disposal implicated. | Cidu et al. (2003)       |
| <sup>2</sup> Lusaka, Zambia          | Dolomite           | Boreholes (7)                                     | FC 0-45<br>TC 0-58<br>SEC 401-1060                                                                                                                          | Single survey                       | Evidence for contamination in health centre boreholes by FC, poor waste management implicated                                     | Nkhuwa (2008)            |

| Area                                       | Geology                           | Sample sites (n)                                           | Results from selected water quality parameters                                                                                                       |                                                                                        | Sampling time-frame                 | Conclusion and sources of contamination                                                                                                                                                  | Reference                |
|--------------------------------------------|-----------------------------------|------------------------------------------------------------|------------------------------------------------------------------------------------------------------------------------------------------------------|----------------------------------------------------------------------------------------|-------------------------------------|------------------------------------------------------------------------------------------------------------------------------------------------------------------------------------------|--------------------------|
| <sup>3</sup> Lusaka, Zambia                | Dolomite                          | Private and public boreholes (N/A)                         | Alk 124-564, NO <sub>3</sub> 0.03-39, NO <sub>2</sub> 0.002-42, NH <sub>4</sub> 0.08-60<br>Cl 42-102, TC 1-TNTC<br>FC 21-TNTC, BOD 2-69<br>COD 9-320 |                                                                                        | Various: 1995-2000                  | Hydrochem, microbiology and incidence of cholera outbreaks compiled to show the rapid deterioration of GW sources associated with poor sanitation                                        | Nkhuwa (2003)            |
| <sup>2</sup> Ndola, Zambia                 | Dolomite and basement lithologies | Wells (123) and boreholes (60) surface waters (41)         | <b>Wells (median)</b><br>TC 7<br>Zn 11.4 µg/L                                                                                                        | <b>Boreholes (med)</b><br>TC 0<br>Zn 139 µg/L                                          | April-June 2013                     | Geological control on trace metal contamination. TC for wells>boreholes but no FC data collected.                                                                                        | Liddle et al (2015)      |
| <sup>3</sup> Kabwe, Zambia                 | Dolomite and basement             | Private (13) and public (12) boreholes, private wells (57) | <b>Dry season</b><br><i>Wells</i><br>TTC 10-6800 (180)<br>Boreholes<br>TTC <2-28 (<2)                                                                | <b>Wet season</b><br><i>Wells</i><br>TTC 2-27600 (570)<br>Boreholes<br>TTC <2-760 (<2) | Dry and wet season 2013-2014        | Widespread FC contamination in shallow wells in both wet and dry seasons, wet>>dry. Generally good quality in peri-urban boreholes but evidence of contamination in some urban boreholes | Sorensen et al., (2015b) |
| <sup>3</sup> South Lunzu, Blantyre, Malawi | Weathered basement                | Borehole, springs and dug well (9)                         | <b>Dry season</b><br>SEC 210-330<br>Cl 21-35<br>Fe 0.1-0.8<br>FC 0-5200<br>FS 0-640                                                                  | <b>Wet season</b><br>SEC 306-383<br>Cl 14-29<br>Fe 0.4-0.7<br>FC 0-11,000<br>FS 0-7000 | Wet and dry season on two occasions | Groundwaters highly contaminated due to poor sanitation and domestic waste disposal. 58% of residence use traditional PL                                                                 | Palamuleni (2002)        |

| Area                                             | Geology                                         | Sample sites ( <i>n</i> )                                       | Results from selected water quality parameters                                                                  | Sampling time-frame                        | Conclusion and sources of contamination                                                                                     | Reference               |
|--------------------------------------------------|-------------------------------------------------|-----------------------------------------------------------------|-----------------------------------------------------------------------------------------------------------------|--------------------------------------------|-----------------------------------------------------------------------------------------------------------------------------|-------------------------|
| <sup>2</sup> Tamatave and Foulpointe, Madagascar | Weathered basement and unconsolidated sediments | Boreholes (53)                                                  | FC 73% >0, 55% 0-10, 54% >10<br>NO <sub>3</sub> 4.4-35, mean 23<br>Pb 1-215 µg/L, mean ca. 5 µg/L               | One-off survey                             | Widespread drinking water contaminated with FC and concerns over Pb from pump materials                                     | MacCarthy et al. (2013) |
| <sup>3</sup> Epworth and Harare, Zimbabwe        | Granite                                         | Wells and boreholes, transect of formal and informal zones (18) | NO <sub>3</sub> 0-30, mean 11<br>PO <sub>4</sub> 0-27.2, mean 3.03<br>FC 0-2, mean 0.75 (cfu x10 <sup>4</sup> ) | Survey carried out with duplicate sampling | Pit latrines, faecal coliforms in older and informal trading areas, urban agriculture, home industries and commercial areas | Zingoni et al. (2005)   |

All concentrations are in mg/L unless otherwise stated, nitrate reported as N. SEC=specific electrical conductivity, PCA=Principal component analysis, LR= logistic regression, Alk=Alkalinity, TDS= total dissolved solids, TH=total hardness, BOD=biochemical oxygen demand, COD=chemical oxygen demand, FC=faecal coliforms, EC=E. coli, TC=total coliforms, FS=faecal streptococcus, TTC=thermos tolerant coliform. Microbiological units as cfc/100 mL unless stated otherwise, BDL=below detection limit. Notation: <sup>1</sup>Case-studies presenting data from a limited number of sites ( $n < 20$ ), limited temporal resolution as a single survey or use only basic chemical indicators and limited analysis of the results; <sup>2</sup> Case studies which either draw from larger data sets or include both chemical and microbiological indicators but have limited data analysis regarding sanitary risk factors; <sup>3</sup> Case studies with greater temporal resolution or are accompanied by a more thorough analysis of the data, for example using statistical techniques to understand the significance of different risk factors on water quality observations.

**Table S2. Groundwater nitrate summary statistics for urban studies in SSA**

| Country       | Town or city            | Geology                                         | source                       | Subset             | Sample number | Sampling time-frame                  | NO3 MIN | NO3 MAX | NO3 MEAN | NO3 SD  | Reference                        |
|---------------|-------------------------|-------------------------------------------------|------------------------------|--------------------|---------------|--------------------------------------|---------|---------|----------|---------|----------------------------------|
| Benin         | Cotonou                 | Quaternary to mid Pleistocene sandstone         | Wells                        |                    | 30            | May 1991, August 1991 and April 1992 | 3.25    | 132     | 51.4     | 45.4    | Boukari et al. (1996)            |
| Cameroon      | Douala                  | Alluvium over Pliocene sand and gravel          | Springs and Boreholes        |                    | 72            | Single survey                        | 0.21    | 94.3    | 32.5     | 28.7    | Takem et al. (2010)              |
| DR Congo      | Kinshasa                | Alluvial and sedimentary sequences              | Wells                        | We and dry seasons | 4             | Seasonal study                       | 76      | 198     | 119      | 39.8    | Vala et al. (2011)               |
| DR Congo      | Brazaville              | Alluvial and sedimentary sequences              | Wells                        | We and dry seasons | 23            | Seasonal study                       | 23      | NA      | 1.32     | 0.64    | Matini et al. (2012)             |
| Ethiopia      | Addis Ababa             | Volcanics                                       | Boreholes and springs        |                    | 9             | Various                              | 0.72    | 35      | 13       | 10      | Abiye (2008)                     |
| Ethiopia      | Mekelle                 | Mesozoic sediments                              | Wells, springs and boreholes |                    | 100           | N/A                                  | 0.21    | 336     | 32.2     | 49.4    | Berhane and Walraevens (2013)    |
| Ghana         | Kumasi                  | Precambrian Basement                            | Wells                        |                    | 10            | N/A                                  | 0       | 0.968   | 0.25     | 0.33    | Nkansah et al. (2010)            |
| Guinea        | Conakry                 | Volcanic rocks, fissured                        | Boreholes                    | Fountains          | 69            | April-May 1994                       | 0.00442 | 11.05   | 1.105    | 0.00442 | Gélinas et al. (1996)            |
| Guinea        | Conakry                 | Volcanic rocks, fissured                        | Wells                        | Mod well           | 69            | April-May 1994                       | 52.156  | 203.32  | 151.606  | 52.156  | Gélinas et al. (1996)            |
| Guinea        | Conakry                 | Volcanic rocks, fissured                        | Wells                        | Trad wells         | 69            | April-May 1994                       | 49.946  | 228.956 | 136.578  | 51.714  | Gélinas et al. (1996)            |
| Guinea Bissau | Bolama City             | Sandy soils and Cenozoic-Modern sediments       | Boreholes                    |                    | 28            | Jul-06                               | 0.9     | 55.3    | 16.6     | 2.4     | Bordalo and Savva-Bordalo (2007) |
| Madagascar    | Tamatave and Foulpointe | Weathered basement and unconsolidated sediments | Boreholes                    |                    | 53            | Single study                         | 4.4     | 35      | 23       | 12      | MacCarthy et al. (2013)          |
| Nigeria       | Abeokuta                | Basement igneous and metamorphic                | Wells                        |                    | 25            | Rainy season, 2008                   | 2.97    | 40.7    | 17.6     | 10.6    | Taiwo et al. (2011)              |

|                 |         |                                      |                              |                         |    |                                            |       |        |       |        |                                    |
|-----------------|---------|--------------------------------------|------------------------------|-------------------------|----|--------------------------------------------|-------|--------|-------|--------|------------------------------------|
| Nigeria         | Calabar | Tertiary to recent sands and gravels | Wells                        |                         | 20 | N/A                                        | 3.96  | 15.4   | 10    | 2.8    | Eni et al. (2011)                  |
| Nigeria         | Ilesha  | Basement                             | Wells                        |                         | 87 | Single survey                              | 0.05  | 550    | 46.3  | 74.7   | Malomo et al. (1990)               |
| Nigeria         | Lagos   | Alluvium over sedimentary            | Wells                        |                         | 18 | Aug-Oct 2004                               | 0.221 | 6.6742 | 1.768 | 1.8564 | Yusuf (2007)                       |
| Nigeria         | Masaka  | Cretaceous sandstone and clay        | Wells                        |                         | 12 | Wet season but not during rainfall         | 44.5  | 92.5   | 61.5  | 20.3   | Alhassan and Ujoh (2011)           |
| Nigeria         | Niamey  | Basement                             | Wells                        |                         | 20 | Monthly between July 1989 and April 1990   | 6.2   | 719    | 127.1 | 185.3  | (Girard and Hillaire-Marcel, 1997) |
| Senegal         | Dakar   | Quaternary                           | Wells                        |                         | 56 | July-October 1997                          | 0     | 540    | 310   | 150    | Cissé Faye et al. (2004)           |
| Senegal         | Dakar   | Quaternary                           | Wells                        |                         | 47 | July and November 1989                     | 43    | 367.5  | 190   | 79.2   | Tandia et al. (1999)               |
| Sierra Leone    | Kulanda | Weathered Granitic Basement          | Wells                        | Wet season              | 33 | Single study                               | 2.21  | 123.7  | 34.2  | 33.1   | Jimmy et al. (2013)                |
| Southern Malawi |         | Weathered Basement                   | Wells                        |                         | 26 | Wet and dry season                         | 0.02  | 4.5    | 0.8   | 1      | Pritchard et al. (2008)            |
| Tanzania        | Dodoma  | Basement                             | Wells, springs and boreholes |                         | 49 | Single survey                              | 0.01  | 449    | 83.85 | 99.2   | Nkotagu (1996)                     |
| Uganda          | Kampala | Basement                             | Boreholes                    | Downgradient of Latrine | 10 | March-August 2010 biweekly sampling        |       |        | 228   | 237    | Nyenje et al. (2013)               |
| Uganda          | Kampala | Basement                             | Springs                      |                         | 4  | Wet and dry season for 5 consecutive weeks | 4.3   | 50     | 17.2  | 12.4   | Nsubuga et al. (2004)              |



|          |                    |                           |                        |                       |    |                                                        |      |     |       |       |                                |
|----------|--------------------|---------------------------|------------------------|-----------------------|----|--------------------------------------------------------|------|-----|-------|-------|--------------------------------|
| Zambia   | Lusaka             | Dolomite                  | Wells                  |                       | 9  | Jul-01                                                 | 0.05 | 43  | 16.6  | 16.8  | Cidu et al. (2003)             |
| Zambia   | Lusaka             | Dolomite                  | Boreholes              |                       | 14 | Various:<br>1995-2000                                  | 0.03 | 110 | 26.6  | 31.4  | Nkhuwa (2003)                  |
| Zimbabwe | Bulawayo           | Granite and<br>Greenstone | Boreholes              | We and dry<br>seasons | 32 | Seasonal<br>study                                      | 0.05 | 44  | 4.2   | 5.3   | Mangore and Taigbenu<br>(2004) |
| Zimbabwe | Epworth,<br>Harare | Granite                   | Wells and<br>boreholes |                       | 18 | Survey<br>carried out<br>with<br>duplicate<br>sampling | 0    | 30  | 11.46 | 10.36 | Zingoni et al. (2005)          |

**Table S3. Factors affecting transport and attenuation of microorganisms in groundwater (from Pedley et al. (2006))**

| <b>Characteristics of the microorganism</b> | <b>Aquifer/soil (environment) properties</b>                   |
|---------------------------------------------|----------------------------------------------------------------|
| Size                                        | Groundwater flow velocity                                      |
| Shape                                       | Dispersion                                                     |
| Density                                     | Pore size (intergranular or fracture)                          |
| Inactivation rate (die-off)                 | Kinematic/effective porosity                                   |
| (Ir)reversible adsorption                   | Organic carbon content and nature of OC                        |
| Physical filtration                         | Temperature                                                    |
|                                             | Chemical properties of groundwater (nutrients, redox, pH etc.) |
|                                             | Mineral composition of aquifer/soil material                   |
|                                             | Predatory microflora                                           |
|                                             | Moisture content                                               |
|                                             | Pressure                                                       |

## References for Tables in Supporting Information

- ABIYE, T A. 2008. Urban groundwater pollution in Addis Ababa, Ethiopia. 261-276 in Applied groundwater studies in Africa. ADELANA, S M A, and MACDONALD, A M (editors). 13. (CRC.)
- ADELEKAN, B A, and ALAWODE, A O. 2011. Contributions of municipal refuse dumps to heavy metals concentrations in soil profile and groundwater in Ibadan Nigeria Journal of Applied Biosciences, Vol. 40, 2727-2737.
- ALEMAYEHU, T. 2006. Heavy metal concentration in the urban environment of Addis Ababa, Ethiopia. Soil and Sediment Contamination: An International Journal, Vol. 15, 591-602.
- Aller L, Bennet T, Lehr J.H, Petty R, 1987. National Water Well Association. DRASTIC: A standardized system for evaluating groundwater pollution potential using hydrogeologic settings. EPA/600/2-85/018, U.S. Environ. Prot. Agency, Ada, Oklahoma.
- ALHASSAN, M M, and UJOH, F. 2011. An assessment of ground water quality for drinking from hand-dug wells in Masaka, Nigeria. Bayero University Journal of Social and Management Studies, Vol. 14, 79-95.
- AREMU, D A, OLAWUYI, J F, MESHITSUKA, S, SRIDHAR, M K, and OLUWANDE, P A. 2002. Heavy metal analysis of groundwater from Warri, Nigeria. International Journal of Environmental Health Research, Vol. 12, 261-267.
- BARRETT, M H, HOWARD, A G, PEDLEY, S, TAYLOR, R G, and NALUBEGA, M. 1998. A comparison of the extent and impacts of sewage contamination on urban groundwater in developed and developing countries. WHO conference: Water, Sanitation and Health, 24-28 November, Bad Elster, Germany.
- BERHANE, G, and WALRAEVENS, K. 2013. Geological and geotechnical constraints for urban planning and natural environment protection: a case study from Mekelle City, Northern Ethiopia. Environmental Earth Sciences, Vol. 69, 783-798.
- BORDALO, A A, and SAVVA-BORDALO, J. 2007. The quest for safe drinking water: An example from Guinea-Bissau (West Africa). Water Research, Vol. 41, 2978-2986.
- BOUKARI, M, GAYE, C B, FAYE, A, and FAYE, S. 1996. The impact of urban development on coastal aquifers near Cotonou, Benin. Journal of African Earth Sciences, Vol. 22, 403-408.

- BRAUNE, E, and XU, Y. 2010. The role of ground water in Sub-Saharan Africa. *Ground Water*, Vol. 48, 229-238.
- CIDU, R, DE WAELE, J, DI GREGARIO, F, and FOLLESA, R. 2003. Geochemistry of groundwater in an intensely urbanised karst area (Lusaka, Zambia) *GeoActa*, Vol. 2, 35-42.
- CISSÉ FAYE, S, FAYE, S, WOHNLICH, S, and GAYE, C. 2004. An assessment of the risk associated with urban development in the Thiaroye area (Senegal). *Environmental Geology*, Vol. 45, 312-322.
- CRONIN, A A, PEDLAY, S, HOADLY, A W, KOUONTO KOMOU, F, HALDIN, L, GIBSON, J, and BRESLIN, N. 2007. Urbanisation effects on groundwater chemical quality: findings focusing on the nitrate problem from 2 African cities reliant on on-site sanitation. *Journal of Water and Health*, Vol. 5, 441-454.
- DEMLIE, M, and WOHNLICH, S. 2006. Soil and groundwater pollution of an urban catchment by trace metals: case study of the Addis Ababa region, central Ethiopia. *Environmental Geology*, Vol. 51, 421-431.
- ENI, D, OBIEFUNA, J N, OKO, C, and EKWOK, I. 2011. Impact of urbanisation on sub-surface water quality in Calabar Municipality, Nigeria. *International Journal of Humanities and Social Science*, Vol. 1, 167-172.
- ERAH, P O, and AKUJIEZE, C N. 2002. The quality of groundwater in Benin City: A baseline study on inorganic chemicals and microbial contaminants of health importance in boreholes and open wells. *Tropical Journal of Pharmaceutical Research*, Vol. 1, 75-82.
- EWODO, M G, EKWELGEN, C, NTEP, F, and EKODECK, G E. 2009. Impact of urbanisation on the Mingsosso watershed in the Yaounde periurban zone. *African Journal of Environmental Science and Technology*, Vol. 3, 272-285.
- FAILLAT, J P. 1990. Sources of Nitrates in Fissure Groundwater in the Humid Tropical Zone - the Example of Ivory-Coast. *Journal of Hydrology*, Vol. 113, 231-264.
- GÉLINAS, Y, RANDALL, H, ROBIDOUX, L, and SCHMIT, J-P. 1996. Well water survey in two districts of Conakry (Republic of Guinea), and comparison with the piped city water. *Water Research*, Vol. 30, 2017-2026.
- GIRARD, P, and HILLAIRES-MARCEL, C. 1997. Determining the source of nitrate pollution in the Niger discontinuous aquifers using the natural  $^{15}\text{N}/^{14}\text{N}$  ratios. *Journal of Hydrology*, Vol. 199, 239-251.

GOSHU, G, and AKOMA, O C. 2011. Water quality assessment of underground and surface water resources of Bahir Dar and Periurban areas, north-west Ethiopia. *Global Journal of Environmental Sciences*, Vol. 10, 11-21.

GOSHU, G, FARNLEITNER, A, MANAFI, M, and BYAMUKAMA, D. 2010. The bacteriological quality of traditional hand dug wells and protected hand pumps in Bahirdar Town and peri-urban areas, Northern Ethiopia. *Proceedings of the First National Research Symposium on: Sustainable Development: A great concern in Africa, Debre Markos, Ethiopia*, 247-259.

HOWARD, G, PEDLEY, S, BARRETT, M, NALUBEGA, M, and JOHAL, K. 2003. Risk factors contributing to microbiological contamination of shallow groundwater in Kampala, Uganda. *Water Research*, Vol. 37, 3421-3429.

IBE, K M, and AGBAMU, P U. 1999. Impacts of human activities on groundwater quality of an alluvial aquifer: A case study of the Warri River, Delta State, SW, Nigeria. *International Journal of Environmental Health Research*, Vol. 9, 329-334.

JIMMY, D H, SUNDUFU, A J, MALANOSKI, A P, JACOBSEN, K H, ANSUMANA, R, LESKI, T A, BANGURA U, BOCKARIE A S, TEJAN E, LIN, B, and STENGER, D A. 2013. Water quality associated public health risk in Bo, Sierra Leone. *Environmental monitoring and assessment*, 185, 1, 241-251.

KIMANI-MURAGE, E, and NGINDU, A. 2007. Quality of water the slum dwellers use: The case of a Kenyan slum. *Journal of Urban Health*, Vol. 84, 829-838.

Liddle, E.S., Mager, S.M. and Nel, E.L., 2014. The importance of community-based informal water supply systems in the developing world and the need for formal sector support. *The Geographical Journal*.

MACCARTHY, M F, ANNIS, J E, and MIHELICIC, J R. 2013. Unsubsidised Self-Supply in Eastern Madagascar. *Water Alternatives*, Vol. 6, 424-438.

Mailu, G. M. (1997). The impact of urbanization on groundwater quality in Wajir Town, Kenya. *IAHS Publication*, 243, 245-253.

MALOMO, S, OKUFARASIN, V A, OLORUNNIWO, M A, and OMODE, A A. 1990. Groundwater Chemistry of Weathered Zone Aquifers of an Area Underlain by Basement-Complex Rocks. *Journal of African Earth Sciences*, Vol. 11, 357-371.

- Matini, L., Tathy, C. and Moutou, J. M. 2012. Seasonal Groundwater Quality Variation in Brazzaville, Congo. *Research Journal of Chemical Sciences* 2(1): 7-14.
- MOMODU, M A, and ANYAKORA, C A. 2010. Heavy metal contamination of ground water: The Surulere case study. *Research Journal Environmental and Earth Sciences*, Vol. 2, 39-43.
- NACHIYUNDE, K, IKEDA, H, TANAKA, K, and KOZAKI, D. 2013. Evaluation of portable water in five provinces of Zambia using a water pollution index. *African Journal of Environmental Science and Technology*, Vol. 7, 14-29.
- NKANSAH, M A, BOADI, N O, and BADU, M. 2010. Assessment of the quality of water from hand-dug wells in Ghana. *Environmental Health Insights.*, Vol. 4, 7-12.
- NKHUWA, D C W. 2006. Groundwater quality assessment in the John Laing and Misisi areas of Lusaka. 239-252 in *Groundwater pollution in Africa*. XU, Y, and USHER, B (editors). (Leiden: Taylor & Francis/Balkema.)
- NKOTAGU, H. 1996. Origins of high nitrate in groundwater in Tanzania. *Journal of African Earth Sciences*, Vol. 22, 471-478.
- NSUBUGA, F B, KANSIIME, F, and OKOT-OKUMU, J. 2004. Pollution of protected springs in relation to high and low density settlements in Kampala—Uganda. *Physics and Chemistry of the Earth, Parts A/B/C*, Vol. 29, 1153-1159.
- NYENJE, PM, FOPPEN, JW, KULABAKO, R, MUWANGA, A, AND UHLENBROOK, S. 2013. Nutrient pollution in shallow aquifers underlying pit latrines and domestic solid waste dumps in urban slums. *Journal of environmental management*, 122, 15-24.
- OBIRI-DANSO, K, ADJEI, B, STANLEY, K, and JONES, K. 2009. Microbiological quality and metal levels in wells and boreholes water in some peri-urban communities in Kumasi, Ghana. *African Journal of Environmental Science & Technology*, Vol. 3, 59-66.
- OCHIENG, G M, OJO, O I, OGEDENGBE, K, and NDAMBUKI, J M. 2011. Open wells, sanitary features, pollutions and water qualities: case study of Ibadan slums, Nigeria *International Journal of the Physical Sciences*, Vol. 6, 3062-3073.
- OLABISI, O E, AWONUSI, A J, and ADEBAYO, O J. 2008. Assessment of bacteria pollution of shallow well water in Abeokuta, Southwestern Nigeria. *Life Science Journal*, Vol. 5, 68-72.

OREBIYI, E O, AWOMESO, J A, IDOWU, O A, MARTINS, O, OGUNTOKE, O, and TAIWO, A M. 2010. Assessment of pollution hazards of shallow well water in Abeokuta and environs, Southwest, Nigeria. *American Journal of Environmental Sciences*, Vol. 6, 50-56.

Ouandaogo-Yameogo, S., Blavoux, B., Nikiema, J. and Savadogo, A.N., 2013. Caractérisation du fonctionnement des aquifères de socle dans la région de Ouagadougou à partir d'une étude de la qualité chimique des eaux. *Revue des sciences de l'eau/Journal of Water Science*, 26(3), pp.173-191.

PALAMULENI, L G. 2002. Effect of sanitation facilities, domestic solid waste disposal and hygiene practices on water quality in Malawi's urban poor areas: a case study of South Lunzu Township in the city of Blantyre. *Physics and Chemistry of the Earth, Parts A/B/C*, Vol. 27, 845-850.

PEDLEY, S, YATES, M, SCHIJVEN, J F, WEST, J, HOWARD, G, BARRETT, M, SCHMOLL, O, CHILTON, J, and CHORUS, I. 2006. Pathogens: health relevance, transport and attenuation. *Protecting groundwater for health: managing the quality of drinking-water sources*. (Geneva: WHO.) ISBN 92-4-154668-9

PRITCHARD, M, MKANDAWIRE, T, and O'NEILL, J G. 2008. Assessment of groundwater quality in shallow wells within the southern districts of Malawi. *Physics and Chemistry of the Earth, Parts A/B/C*, Vol. 33, 812-823.

Sorensen, J.P.R., Lapworth, D.J., Marchant, B.P., Nkhuwa, D.C.W., Pedley, S., Stuart, M.E., Bell, R.A., Chirwa, M., Kabika, J., Liemisa, M. and Chibesa, M., 2015b. In-situ tryptophan-like fluorescence: a real-time indicator of faecal contamination in drinking water supplies. *Water research*, 81, pp.38-46.

Sorensen, J.P.R., Lapworth, D.J., Nkhuwa, D.C.W., Stuart, M.E., Gooddy, D.C., Bell, R.A., Chirwa, M., Kabika, J., Liemisa, M., Chibesa, M. and Pedley, S., 2015c. Emerging contaminants in urban groundwater sources in Africa. *Water research*, 72, pp.51-63.

Tabor, M., Kibret, M. and Abera, B., 2011. Bacteriological and physicochemical quality of drinking water and hygiene-sanitation practices of the consumers in Bahir Dar City, Ethiopia. *Ethiopian journal of health sciences*, 21(1), pp.19-26.

TAIWO, A M, ADEOGUN, A O, OLATUNDE, K A, and ADEGBITE, K I. 2011. Analysis of groundwater quality of hand-dug wells in peri-urban area of Obantoko, Abeokuta, Nigeria for selected physico-chemical parameters. *The Pacific Journal of Science and Technology*, Vol. 12, 527-534.

TAKEM, G E, CHANDRASEKHARAM, D, AYONGHE, S N, and THAMBIDURAI, P. 2010. Pollution characteristics of alluvial groundwater from springs and bore wells in semi-urban informal settlements of Douala, Cameroon, Western Africa. *Environmental Earth Sciences*, Vol. 61, 287-298.

VALA, R M K, TICHAGWA, L, MUSIBONO, D E, and LUKANDA, V M. 2011. Environmental and health concerns regarding the quality of water in a poor suburb of Kinshasa in the Democratic Republic of Congo. *Water Science & Technology: Water Supply*, Vol. 11, 266-273.

Wright, J.A., Cronin, A., Okotto-Okotto, J., Yang, H., Pedley, S. and Gundry, S.W., 2013. A spatial analysis of pit latrine density and groundwater source contamination. *Environmental monitoring and assessment*, 185 (5), pp.4261-4272.

YUSUF, K A. 2007. Evaluation of groundwater quality characteristics in Lagos City. *Journal of Applied Sciences*, Vol. 7, 17980-11784.

ZINGONI, E, LOVE, D, MAGADZA, C, MOYCE, W, and MUSIWA, K. 2005. Effects of a semi-formal urban settlement on groundwater quality: Epworth (Zimbabwe): Case study and groundwater quality zoning. *Physics and Chemistry of the Earth, Parts A/B/C*, Vol. 30, 680-688.
